# Supplementary material
Source: ML conference proceedings conference paper supplement (https://openaccess.thecvf.com/content/ICCV2021/html/Moran_Deep_Permutation_Equivariant_ICCV_2021_paper.html)
Supplement: Supplementary file 1 [file Moran_Deep_Permutation_Equivariant_ICCV_2021_supplemental.pdf]

# Deep Permutation Equivariant Structure from Motion

## -Supplementary Material-

Dror Moran<sup>1\*</sup>

Haggai Maron<sup>2</sup>

Hodaya Koslowsky<sup>1\*</sup>

Meirav Galun<sup>1</sup>

Yoni Kasten<sup>1</sup>

Ronen Basri<sup>1</sup>

<sup>1</sup>Weizmann Institute of Science

<sup>2</sup>NVIDIA Research

Below we provide implementation details for the baseline methods and the alternative deep architectures tested in our paper. We further include additional results, including examples of reconstructions with our method.

### 1. Baselines

**Colmap baseline.** In the calibrated experiments (Table 2 in the paper), for fair comparison, we applied Colmap [9] directly to the points tracks provided by Olsson’s dataset [7] and fixed the intrinsic camera parameters to those provided as ground truth.

**Linear baseline.** We tested Jiang et al.’s method [3] while ignoring viewing graph edges for which the number of matching points was lower than a certain threshold. We used thresholds of 30, 200, 500 matching points and report those results for which the lowest reprojection error, before bundle adjustment, was obtained.

### 2. Alternative deep architectures

The two right most columns in Table 5 in the paper show results of two novel deep architectures which were developed for comparison to our deep network architecture. The details are given below.

**Set neural network.** For a scene with  $m$  cameras, the input to this network is a set of  $m$  random feature vectors of size 12 that provide unique ids to each camera. Inspired by [8, 11], our set network is composed of three sub-networks where each sub-network is an equivariant set network. The first sub-network is applied to each feature vector and calculates a local feature for each camera. The second sub-network is applied to each such local feature. The outputs for all cameras are then averaged, producing a global scene feature vector. Finally, the camera parameters are predicted by applying the third sub-network to both the local and global feature. In summary, the set network prediction for camera  $i$  is defined as follows

$$\begin{aligned} \mathbf{z}_i &= S_1(\mathbf{v}_i) \\ \mathbf{z}_g &= \frac{1}{m} \sum_{i=1}^m S_2(\mathbf{z}_i) \\ P_i &= S_3(\mathbf{z}_i, \mathbf{z}_g). \end{aligned}$$

Each  $S_k$  is a fully connected network and  $\mathbf{v}_i$  is the initial random vector of camera  $i$ .

**Graph neural network.** Here, the cameras are represented by the nodes of a graph, called the *viewing graph*. An edge connects a pair of nodes if the respective images share at least 30 tracks, in which case a fundamental matrix is computed. The fundamental matrices are used as edge input features, while as with the set network model, random vectors form the

---

\*Equal contributors.

| Scan                                  | #Images | #Points | Error (pixels) |             |             |             |             |             |
|---------------------------------------|---------|---------|----------------|-------------|-------------|-------------|-------------|-------------|
|                                       |         |         | Before BA      |             | After BA    |             |             |             |
|                                       |         |         | Ours           | GPSFM       | Ours        | GPSFM       | PPSFM       | VarPro      |
| Alcatraz Courtyard                    | 133     | 23674   | <b>1.55</b>    | 20.34       | <b>0.52</b> | <b>0.52</b> | 0.57        | <b>0.52</b> |
| Alcatraz Water Tower                  | 172     | 14828   | <b>2.18</b>    | 16.5        | <b>0.47</b> | 0.63        | 0.59        | <b>0.47</b> |
| Alcatraz West Side Gardens            | 419     | 65072   | <b>9.54</b>    | 1007.5      | <b>0.76</b> | 326.99      | 1.77        | -           |
| Basilica Di San Petronio              | 334     | 46035   | <b>7.9</b>     | 1871.41     | 0.96        | 60.69       | <b>0.63</b> | -           |
| Buddah Statue                         | 322     | 156356  | <b>18.88</b>   | 919.26      | 2.93        | 96.96       | <b>0.41</b> | -           |
| Buddah Tooth Relic Temple Singapore   | 162     | 27920   | <b>4.59</b>    | 18.53       | <b>0.6</b>  | 0.62        | 0.71        | <b>0.6</b>  |
| Corridor                              | 11      | 737     | <b>0.3</b>     | 0.64        | <b>0.26</b> | <b>0.26</b> | 0.27        | <b>0.26</b> |
| Ecole Superior De Guerre              | 35      | 13477   | <b>0.75</b>    | 1.88        | <b>0.26</b> | <b>0.26</b> | 0.28        | <b>0.26</b> |
| Dinosaur 319                          | 36      | 319     | <b>2.35</b>    | 4.66        | 1.53        | <b>0.43</b> | 0.47        | <b>0.43</b> |
| Dinosaur 4983                         | 36      | 4983    | 1.96           | <b>1.54</b> | 0.57        | <b>0.42</b> | 0.47        | <b>0.42</b> |
| Doge Palace Venice                    | 241     | 67107   | <b>3.6</b>     | 170.93      | <b>0.6</b>  | 3.52        | 0.67        | -           |
| Eglise du dome                        | 85      | 84792   | <b>1.1</b>     | 8.41        | <b>0.24</b> | <b>0.24</b> | 0.25        | -           |
| Drinking Fountain Somewhere In Zurich | 14      | 5302    | <b>0.33</b>    | 1.29        | <b>0.28</b> | <b>0.28</b> | 0.31        | <b>0.28</b> |
| East Indiaman Goteborg                | 179     | 25655   | <b>3.31</b>    | 99.38       | 0.99        | 5.11        | <b>0.67</b> | -           |
| Folke Filbyter                        | 40      | 21150   | 8.87           | <b>1.78</b> | 8.58        | 0.82        | <b>0.33</b> | 277.89      |
| Golden Statue Somewhere In Hong Kong  | 18      | 39989   | <b>0.35</b>    | 0.81        | <b>0.22</b> | <b>0.22</b> | 0.24        | <b>0.22</b> |
| Gustav Vasa                           | 18      | 4249    | <b>0.23</b>    | 1.82        | <b>0.16</b> | <b>0.16</b> | 0.17        | <b>0.16</b> |
| GustavIIAdolf                         | 57      | 5813    | 14.77          | <b>5.91</b> | 5.83        | <b>0.23</b> | 0.24        | <b>0.23</b> |
| Model House                           | 10      | 672     | <b>0.37</b>    | 3.66        | <b>0.34</b> | 1.12        | 0.4         | <b>0.34</b> |
| Jonas Ahlstromer                      | 40      | 2021    | <b>14.38</b>   | 28.83       | 4.72        | <b>0.18</b> | 0.2         | <b>0.18</b> |
| Lund University Sphinx                | 70      | 32668   | <b>3.64</b>    | 10.0        | <b>0.34</b> | 0.45        | 0.37        | <b>0.34</b> |
| Nijo Castle Gate                      | 19      | 7348    | <b>0.71</b>    | 20.08       | <b>0.39</b> | <b>0.39</b> | 0.43        | <b>0.39</b> |
| Pantheon Paris                        | 179     | 29383   | <b>1.75</b>    | 44.85       | <b>0.49</b> | 2.85        | 0.62        | -           |
| Park Gate Clermont Ferrand            | 34      | 9099    | <b>0.61</b>    | 13.82       | <b>0.31</b> | 0.32        | 0.49        | <b>0.31</b> |
| Plaza De Armas Santiago               | 240     | 26969   | <b>5.1</b>     | 81.01       | <b>0.64</b> | 3.14        | 0.71        | -           |
| Porta San Donato Bologna              | 141     | 25490   | <b>1.58</b>    | 33.36       | <b>0.4</b>  | 0.61        | 3.75        | <b>0.4</b>  |
| The Pumpkin                           | 195     | 69335   | 14.45          | <b>8.97</b> | <b>0.38</b> | <b>0.38</b> | 0.42        | -           |
| Skansen Kronan Gothenburg             | 131     | 28371   | <b>1.19</b>    | 8.9         | <b>0.41</b> | 0.44        | 0.44        | -           |
| Skansen Lejonet Gothenburg            | 368     | 74423   | <b>10.82</b>   | 69.81       | 2.05        | 7.48        | <b>1.28</b> | -           |
| Smolny Cathedral St Petersburg        | 131     | 51115   | <b>1.66</b>    | 83.78       | <b>0.46</b> | <b>0.46</b> | 0.5         | -           |
| Some Cathedral In Barcelona           | 177     | 30367   | <b>3.67</b>    | 14.77       | <b>0.51</b> | <b>0.51</b> | 0.54        | -           |
| Sri Mariamman Singapore               | 222     | 56220   | <b>7.06</b>    | 39.89       | <b>0.61</b> | 0.78        | 0.85        | -           |
| Sri Thendayuthapani Singapore         | 98      | 88849   | <b>2.12</b>    | 13.25       | <b>0.31</b> | 0.56        | 0.33        | -           |
| Sri Veeramakaliamman Singapore        | 157     | 130013  | <b>6.47</b>    | 99.99       | <b>0.52</b> | 1.78        | 0.66        | -           |
| Thian Hook Keng Temple Singapore      | 138     | 34288   | <b>7.59</b>    | 26.78       | <b>0.54</b> | 0.55        | 0.66        | <b>0.54</b> |
| King's College University Of Toronto  | 77      | 7087    | <b>2.27</b>    | 22.89       | 0.78        | 2.35        | 0.26        | <b>0.24</b> |
| Tsar Nikolai I                        | 98      | 37857   | <b>6.04</b>    | 13.21       | 2.43        | 0.33        | 0.31        | <b>0.29</b> |
| Urban II                              | 96      | 22284   | <b>16.91</b>   | 87.25       | 6.84        | <b>0.27</b> | 0.31        | 3.61        |

Table 1: Single scene experiments in the uncalibrated setup. The table shows mean reprojection errors obtained with our method before and after BA, compared to GPSFM [5], PPSFM [6] and VarPro [2]. (*Smaller is better.*) Our comparison to VarPro is partial, since in a number of experiments it exceeded either memory or runtime limitations.

node input features. We use a message-passing scheme [1] and global feature as described for the set network model. Each message-passing layer is of the following form

$$\mathbf{z}_i^l = \frac{1}{|N_i|} \sum_{j \in N_i} \text{mlp}_l(\mathbf{z}_i^{l-1}, \mathbf{z}_j^{l-1}, F_{ij})$$

where  $\mathbf{z}_i^l$  is the local feature of node  $i$  in layer  $l$ ,  $N_i$  are the neighbors of node  $i$  and  $F_{ij}$  is the fundamental matrix measured between cameras  $i$  and  $j$ .

Both the set and the graph models predict camera parameters, while the 3D points are treated as free variables. In both cases we minimize the reprojection loss defined in equation (3) in the paper.

### 3. Results

**Single scene recovery.** In the single scene recovery mode given a single track tensor representing point correspondences across images of some scene we attempt to minimize the reprojection loss, where the network is used to parameterize the loss. Tables 1 and 2 show results of our method before and after bundle adjustment in the uncalibrated and calibrated settings. We compare our results before bundle adjustment only to global methods since sequential methods apply bundle adjustment in each iteration. Notably, already before bundle adjustment our method often achieves sub-pixel accuracies, significantly surpassing GPSFM in the uncalibrated setting and GESFM and Linear in the calibrated setting. Figures 1-3 show 3D reconstructions and camera parameter recovery in the calibrated setting. In addition, a failure case is shown in Figure 4. Figure 5 shows the evolution of structure and camera parameters during optimization.

| Scan                                  | #Images | #Points | Before BA    |              |              |              |              |              |                   |             |          | After BA            |                    |                      |                    |                    |                      |                    |                  |                     |                  |                    |
|---------------------------------------|---------|---------|--------------|--------------|--------------|--------------|--------------|--------------|-------------------|-------------|----------|---------------------|--------------------|----------------------|--------------------|--------------------|----------------------|--------------------|------------------|---------------------|------------------|--------------------|
|                                       |         |         | $t_{error}$  |              |              | $R_{error}$  |              |              | Reprojection Err. |             |          | $t_{error}$         |                    |                      | $R_{error}$        |                    |                      | Reprojection Err.  |                  |                     |                  |                    |
|                                       |         |         | Ours         | GESFM        | Linear       | Ours         | GESFM        | Linear       | Ours              | GESFM       | Linear   | Ours                | GESFM              | Linear               | Ours               | GESFM              | Linear               | Ours               | GESFM            | Linear              |                  |                    |
| Alcatraz Courtyard                    | 133     | 23674   | <b>0.16</b>  | 0.767        | 0.378        | <b>0.619</b> | 1.851        | 0.729        | <b>1.64</b>       | 66.5        | 16.58    | 0.015               | 0.259              | <b>0.014 0.014</b>   | 0.049              | 0.533              | <b>0.042 0.043</b>   | <b>0.81</b>        | 4.67             | 1.27 <b>0.81</b>    |                  |                    |
| Alcatraz Water Tower                  | 172     | 14828   | <b>0.518</b> | 8.332        | 1.643        | <b>0.933</b> | 1.136        | 1.525        | <b>2.13</b>       | 131.81      | 56.26    | 0.116               | 9.147              | <b>1.643 0.115</b>   | 0.23               | 9.997              | <b>1.525 0.228</b>   | <b>0.55</b>        | 25.93            | 73.72 <b>0.55</b>   |                  |                    |
| Buddah Tooth Relic Temple Singapore   | 162     | 27920   | <b>0.233</b> | 2.124        | 1.325        | <b>1.03</b>  | 2.95         | 2.058        | <b>2.06</b>       | 89.94       | 47.5     | <b>0.014</b>        | 1.429              | <b>0.125 0.015</b>   | <b>0.081</b>       | 4.709              | <b>0.551 0.083</b>   | <b>0.85</b>        | 13.22            | 2.66 <b>0.85</b>    |                  |                    |
| Doge Palace Venice                    | 241     | 67107   | <b>0.342</b> | 1.688        | -            | <b>1.163</b> | 2.75         | -            | <b>3.62</b>       | 123.53      | -        | 0.029               | 1.608              | <b>-0.012</b>        | 0.211              | 5.317              | <b>-0.031</b>        | 1.0                | 22.32            | - <b>0.98</b>       |                  |                    |
| Door Land                             | 12      | 17650   | <b>0.006</b> | 1.603        | 0.226        | <b>0.024</b> | (2.041)      | 1.148        | <b>0.32</b>       | (227.0)     | 20.89    | <b>0.001</b>        | (0.973)            | <b>0.001 0.001</b>   | 0.006              | (7.552)            | <b>0.005 0.005</b>   | <b>0.3</b>         | (9.21)           | <b>0.3 0.3</b>      |                  |                    |
| Drinking Fountain Somewhere In Zurich | 14      | 5302    | <b>0.004</b> | (0.016)      | 0.024        | <b>0.031</b> | (0.054)      | 0.077        | <b>0.33</b>       | (0.94)      | 0.58     | <b>0.002</b>        | (0.002)            | <b>0.002 0.002</b>   | <b>0.007</b>       | (0.01)             | <b>0.007 0.007</b>   | 0.31               | (0.27)           | 0.31 <b>0.31</b>    |                  |                    |
| East Indianar Gateborg                | 179     | 25655   | <b>0.621</b> | 2.783        | (2.235)      | <b>3.814</b> | 11.129       | (3.284)      | <b>4.13</b>       | 170.63      | (94.46)  | <b>0.509</b>        | 3.099              | <b>(2.235) 0.065</b> | <b>3.117</b>       | 12.396             | <b>(3.284) 0.251</b> | <b>1.85</b>        | 32.37            | <b>(312.9) 0.89</b> |                  |                    |
| Ecole Superior De Guerre              | 35      | 13477   | 0.081        | (0.006)      | 0.048        | 0.318        | (0.057)      | 0.182        | <b>0.72</b>       | (0.35)      | 1.48     | 0.005               | (0.002)            | 0.005                | 0.005              | <b>0.024</b>       | (0.035)              | <b>0.024 0.024</b> | <b>0.34</b>      | (0.14)              | 0.34 <b>0.34</b> |                    |
| Eglise du dome                        | 85      | 84792   | 0.205        | (1.958)      | <b>0.128</b> | <b>0.808</b> | (2.851)      | 0.903        | <b>0.91</b>       | (90.83)     | 26.4     | <b>0.01</b>         | (1.425)            | <b>0.046 0.01</b>    | 0.037              | (3.631)            | <b>0.162 0.036</b>   | <b>0.27</b>        | (6.21)           | 0.76 <b>0.27</b>    |                  |                    |
| Folke Filbyter                        | 40      | 21150   | 0.125        | (0.003)      | 0.021        | 74.596       | (0.332)      | 1.94         | 10.37             | (5.74)      | 72.06    | 0.118               | (0.0)              | 0.123                | <b>0.0</b>         | 70.157             | <b>(0.148)</b>       | <b>4.484 0.036</b> | 4.29             | (0.41)              | 6.06 <b>0.29</b> |                    |
| Fort Channing Gate Singapore          | 27      | 23627   | 0.093        | <b>0.092</b> | 0.139        | <b>0.207</b> | 0.295        | 0.659        | <b>0.52</b>       | 2.57        | 22.69    | <b>0.008 0.008</b>  | 0.013              | <b>0.008</b>         | <b>0.02</b>        | <b>0.02</b>        | <b>0.029 0.02</b>    | <b>0.25</b>        | <b>0.25</b>      | 0.45 <b>0.25</b>    |                  |                    |
| Golden Statue Somewhere In Hong Kong  | 18      | 39989   | <b>0.073</b> | 0.118        | 1.153        | <b>0.292</b> | 0.669        | 8.264        | <b>0.4</b>        | 4.98        | 73.7     | <b>0.004 0.004</b>  | 0.031              | 0.03                 | <b>0.022 0.031</b> | <b>0.27</b>        | <b>0.27</b>          | 0.3                | <b>0.27</b>      | 0.3 <b>0.27</b>     |                  |                    |
| Gustav Vasa                           | 18      | 4249    | 1.085        | (0.079)      | 0.266        | 34.181       | (0.841)      | 1.658        | <b>8.52</b>       | (5.21)      | 11.99    | 1.145               | (0.101)            | <b>0.099</b>         | 0.1                | 32.266             | (0.751)              | 0.839              | 0.841            | 3.15                | (0.31)           | 0.48 <b>0.48</b>   |
| GustavAdolf                           | 57      | 5813    | 9.714        | <b>0.134</b> | 0.333        | 67.784       | <b>0.435</b> | 1.398        | 13.91             | <b>6.49</b> | 31.08    | 8.524               | <b>0.004</b>       | <b>0.004 0.004</b>   | <b>0.004 0.004</b> | 58.458             | <b>0.021</b>         | <b>0.021 0.021</b> | 11.49            | <b>0.26</b>         | <b>0.26 0.26</b> |                    |
| Jonas Ahlstromer                      | 40      | 2021    | 10.888       | (0.35)       | 0.895        | 50.19        | (1.994)      | 10.154       | <b>10.82</b>      | (36.48)     | 236.41   | 10.451              | (0.01)             | 1.259                | 0.011              | 47.117             | (0.082)              | <b>5.391 0.036</b> | 8.41             | (0.69)              | 4.69 <b>0.22</b> |                    |
| King's College University Of Toronto  | 77      | 7087    | 0.235        | (0.152)      | (1.781)      | 0.989        | (0.645)      | (1.07)       | <b>0.9</b>        | (11.87)     | (27.29)  | 0.017               | (0.005)            | (1.877)              | 0.017              | 0.085              | (0.059)              | (4.624)            | 0.084            | <b>0.34</b>         | (0.35)           | (7.12) <b>0.34</b> |
| Land University Sphinx                | 70      | 32608   | 4.585        | <b>0.228</b> | 1.199        | 19.522       | <b>0.738</b> | 3.476        | <b>4.78</b>       | 7.19        | 60.64    | 2.191               | 0.016              | <b>1.512 0.009</b>   | 8.752              | 0.058              | <b>5.452 0.033</b>   | 3.36               | 0.4              | 4.58 <b>0.39</b>    |                  |                    |
| Nijo Castle Gate                      | 19      | 7348    | 0.286        | <b>0.141</b> | 0.348        | 1.495        | <b>0.399</b> | 2.097        | <b>1.7</b>        | 11.18       | 154.96   | 0.012               | <b>0.011</b>       | 0.19                 | <b>0.011</b>       | 0.069              | <b>0.064</b>         | 0.744              | <b>0.064</b>     | <b>0.73</b>         | <b>0.73</b>      | 4.84 <b>0.73</b>   |
| Pantheon Paris                        | 179     | 29383   | <b>0.05</b>  | 0.867        | 1.275        | <b>0.192</b> | 3.766        | 2.655        | <b>1.47</b>       | 79.24       | 39.69    | <b>0.005</b>        | 0.595              | 0.011                | -                  | <b>0.04</b>        | 3.208                | 0.072              | -                | <b>0.49</b>         | 9.71             | 0.82 -             |
| Park Gate Clermont Ferrand            | 34      | 9099    | 0.125        | <b>0.083</b> | 0.1          | 0.391        | <b>0.203</b> | 0.296        | <b>0.57</b>       | 1.71        | 10.5     | <b>0.022 0.022</b>  | <b>0.022 0.022</b> | <b>0.049 0.049</b>   | <b>0.049 0.049</b> | <b>0.049 0.049</b> | <b>0.35</b>          | <b>0.35</b>        | <b>0.35 0.35</b> | <b>0.35</b>         | <b>0.35</b>      | 1.13 -             |
| Porta San Donato Bologna              | 240     | 26969   | 2.944        | <b>0.45</b>  | -            | 6.782        | <b>0.291</b> | -            | <b>7.4</b>        | 146.56      | -        | 1.383               | 2.244              | -                    | <b>0.048</b>       | 2.556              | 6.344                | -                  | <b>0.122</b>     | 4.9                 | 15.61            | - <b>1.13</b>      |
| Porta San Donato Bologna              | 141     | 25490   | <b>0.388</b> | 0.949        | 1.588        | 2.153        | <b>1.013</b> | 1.381        | <b>2.28</b>       | 29.5        | 46.12    | <b>0.046</b>        | 0.169              | 0.067                | 0.047              | <b>0.005</b>       | 0.513                | 0.149              | 0.099            | <b>0.75</b>         | 3.23             | 1.16 <b>0.75</b>   |
| Round Church Cambridge                | 92      | 84643   | 1.003        | 0.486        | <b>0.217</b> | 2.451        | 1.021        | <b>0.634</b> | <b>2.66</b>       | 19.04       | 9.6      | 0.582               | 0.493              | <b>0.012 0.012</b>   | 1.107              | 1.851              | <b>0.033 0.035</b>   | 1.54               | 2.03             | 0.41 <b>0.39</b>    |                  |                    |
| Skansen Kronan Gothenburg             | 131     | 28371   | 0.226        | <b>0.223</b> | (0.234)      | 0.736        | <b>0.549</b> | (0.679)      | <b>1.24</b>       | 8.82        | (18.49)  | 0.008               | 0.008              | (0.007)              | 0.008              | 0.026              | 0.025                | (0.02)             | 0.025            | <b>0.67</b>         | <b>0.67</b>      | (0.69) <b>0.67</b> |
| Some Cathedral St Petersburg          | 131     | 51115   | <b>0.051</b> | 0.209        | -            | 0.554        | <b>0.493</b> | -            | <b>1.66</b>       | 19.01       | -        | <b>0.006</b>        | 0.007              | -                    | <b>0.006</b>       | 0.033              | <b>0.028</b>         | -                  | 0.029            | <b>0.81</b>         | 1.0              | - <b>0.81</b>      |
| Some Cathedral In Barcelona           | 177     | 30367   | <b>0.515</b> | 1.776        | 1.261        | <b>0.88</b>  | 1.519        | 3.126        | <b>2.87</b>       | 47.12       | 66.97    | 0.011               | 0.013              | 0.024                | <b>0.01</b>        | 0.026              | 0.031                | 0.057              | <b>0.025</b>     | <b>0.89</b>         | 1.09             | <b>0.89</b>        |
| Sri Mariamman Singapore               | 222     | 56220   | <b>0.683</b> | 1.758        | 0.721        | 2.302        | <b>1.433</b> | 1.615        | <b>4.13</b>       | 52.13       | 37.16    | <b>0.023</b>        | 0.614              | <b>0.025 0.023</b>   | <b>0.077</b>       | 2.158              | 0.083                | 0.078              | 0.91             | 7.4                 | 1.17 <b>0.89</b> |                    |
| Sri Thendayuthapani Singapore         | 98      | 88849   | 3.812        | (0.285)      | 0.375        | 46.269       | (1.561)      | 1.581        | 23.37             | (15.93)     | 19.57    | <b>0.287</b>        | (0.053)            | <b>0.034 0.034</b>   | 44.17              | (0.329)            | <b>0.138 0.138</b>   | 8.44               | (0.56)           | 0.72 <b>0.67</b>    |                  |                    |
| Sri Veremakalliamman Singapore        | 157     | 130013  | 0.597        | (1.966)      | <b>0.273</b> | 2.559        | (1.807)      | <b>0.519</b> | <b>3.47</b>       | (205.96)    | 18.08    | 0.04                | (1.388)            | 0.095                | 0.038              | 0.175              | (3.41)               | 0.288              | <b>0.169</b>     | 0.73                | (34.72)          | 2.2 <b>0.71</b>    |
| Statue Of Liberty                     | 134     | 49250   | 20.012       | (4.55)       | <b>3.031</b> | 46.887       | (3.449)      | <b>3.357</b> | <b>26.16</b>      | (1031.8)    | 133.81   | 4.122               | (4.782)            | <b>28.049 0.099</b>  | 9.091              | (8.281)            | 2.945                | <b>0.213</b>       | 6.97             | (52.05)             | <b>5.08</b>      | <b>1.25</b>        |
| The Pumpkin                           | 196     | 69341   | 14.89        | <b>0.513</b> | (1.656)      | 94.672       | <b>2.036</b> | (4.215)      | 33.41             | <b>9.71</b> | (122.54) | <b>14.952 0.022</b> | (14.862)           | <b>0.022</b>         | 98.862             | 0.092              | (3.123)              | <b>0.091</b>       | 24.85            | <b>0.57</b>         | (24.19)          | <b>0.57</b>        |
| Thian Hook Keng Temple Singapore      | 138     | 34288   | <b>0.082</b> | 0.519        | 0.404        | <b>0.832</b> | 2.751        | 3.047        | <b>2.75</b>       | 53.79       | 62.7     | <b>0.008</b>        | 0.024              | <b>0.043 0.008</b>   | <b>0.081</b>       | 0.245              | 0.424                | 0.084              | 1.13             | 3.32                | 4.92 <b>1.12</b> |                    |
| Urban Nikolai I                       | 98      | 37857   | 9.467        | <b>0.219</b> | 0.261        | 48.499       | <b>0.475</b> | 1.437        | 9.79              | <b>5.19</b> | 32.86    | <b>7.836</b>        | <b>0.005</b>       | <b>0.005 0.005</b>   | <b>0.018</b>       | <b>0.018</b>       | <b>0.018 0.018</b>   | 6.53               | <b>0.33</b>      | <b>0.33</b>         | <b>0.33</b>      | <b>0.33</b>        |
| Urban II                              | 96      | 22284   | 9.467        | <b>0.774</b> | 2.044        | 47.49        | <b>2.077</b> | 8.951        | <b>9.38</b>       | 31.71       | 176.19   | 9.586               | 0.036              | <b>3.038 0.021</b>   | 48.214             | 0.175              | <b>16.348 0.107</b>  | 6.92               | 0.72             | 17.61 <b>0.38</b>   |                  |                    |
| Vercingetorix                         | 69      | 10754   | 8.788        | <b>1.158</b> | 2.786        | 69.328       | <b>2.203</b> | 2.365        | <b>5.08</b>       | 15.87       | 65.57    | 3.104               | 0.3                | <b>1.564 0.011</b>   | 17.706             | 1.431              | <b>7.138 0.048</b>   | 1.5                | 0.54             | 2.93 <b>0.23</b>    |                  |                    |
| Yueh Hai Ching Temple Singapore       | 43      | 13774   | <b>0.098</b> | (0.642)      | 0.303        | <b>0.72</b>  | (1.813)      | 1.92         | <b>0.94</b>       | (27.32)     | 45.19    | <b>0.014</b>        | (0.023)            | <b>0.059 0.014</b>   | <b>0.043</b>       | (0.075)            | <b>0.26 0.043</b>    | <b>0.65</b>        | (1.64)           | 2.06 <b>0.65</b>    |                  |                    |

Table 2: Single scene experiments in the calibrated setup. The table shows mean camera location error (denoted  $t_{error}$ ) in meters, mean orientation error (denoted  $R_{error}$ ) in degrees, and mean reprojection error in pixels obtained with our method before and after BA, compared to GESFM [4], Linear [3], and Colmap [10]. ( *Smaller is better.*) In parenthesis experiments in which at least 10% of the cameras are removed.

| Scan                          | #Images | #Points | $t_{error}$  |                    |              | $R_{error}$        |                    |              | Reprojection Error |             |             |
|-------------------------------|---------|---------|--------------|--------------------|--------------|--------------------|--------------------|--------------|--------------------|-------------|-------------|
|                               |         |         | Ours         |                    |              | Ours               |                    |              | Ours               |             |             |
|                               |         |         | No BA        | Ours               | Colmap       | No BA              | Ours               | Colmap       | No BA              | Ours        | Colmap      |
| Folke Filbyter                | 40      | 21150   | 0.093        | <b>0.037</b>       | <b>0.0</b>   | 54.025             | 20.51              | <b>0.036</b> | 9.78               | 3.87        | <b>0.29</b> |
| Gustav Vasa                   | 18      | 4249    | 0.193        | <b>0.099</b>       | 0.1          | 2.964              | <b>0.839</b>       | 0.841        | 0.62               | <b>0.48</b> | <b>0.48</b> |
| GustavAdolf                   | 57      | 5813    | 0.014        | <b>0.004 0.004</b> | 0.068        | <b>0.021 0.021</b> | 0.29               | <b>0.26</b>  | 0.29               | <b>0.26</b> | <b>0.26</b> |
| Jonas Ahlstromer              | 40      | 2021    | 0.018        | <b>0.011 0.011</b> | 0.051        | <b>0.037 0.036</b> | 0.24               | <b>0.22</b>  | <b>0.22</b>        | <b>0.22</b> | <b>0.22</b> |
| Plaza De Armas Santiago       | 240     | 26969   | <b>0.044</b> | 0.048              | 0.048        | <b>0.089</b>       | 0.121              | 0.122        | 1.3                | <b>1.13</b> | <b>1.13</b> |
| Sri Thendayuthapani Singapore | 98      | 88849   | 0.057        | <b>0.034 0.034</b> | 0.034        | 0.222              | 0.139              | <b>0.138</b> | 0.77               | <b>0.67</b> | <b>0.67</b> |
| Statue Of Liberty             | 134     | 49250   | 8.558        | 1.877              | <b>0.099</b> | 13.262             | 3.02               | <b>0.213</b> | 6.86               | 1.76        | <b>1.25</b> |
| The Pumpkin                   | 196     | 69341   | 0.17         | <b>0.022 0.022</b> | 0.022        | 0.851              | 0.092              | <b>0.091</b> | 0.7                | <b>0.57</b> | <b>0.57</b> |
| Tsar Nikolai I                | 98      | 37857   | 0.024        | <b>0.005 0.005</b> | 0.005        | 0.092              | <b>0.018 0.018</b> | 0.018        | 0.38               | <b>0.33</b> | <b>0.33</b> |
| Urban II                      | 96      | 22284   | 0.074        | <b>0.021 0.021</b> | 0.021        | 0.327              | <b>0.107 0.107</b> | 0.107        | 0.53               | <b>0.38</b> | <b>0.38</b> |

Table 3: Single scene results using sequential optimization in the calibrated setup. The table show results before and after bundle adjustment compared to Colmap. The table shows mean camera location error (denoted  $t_{error}$ ) in meters, mean orientation error (denoted  $R_{error}$ ) in degrees, and mean reprojection error in pixels. ( *Smaller is better.*)

**Sequential optimization.** In some experiments, as can be seen in Table 2, our single scene recovery procedure failed to produce accurate reconstruction. In these cases (we declared failure if the reprojection error exceeded 2 pixels) we applied instead optimization at a sequential schedule. For this schedule we ordered the images greedily by the number of point tracks they share with the images that precede them in this order. Using this order, we first ran 500 optimization epochs with just the first 2 images. Then, after each 500 more epochs we add to this subset the next image in the order. As can be seen in Table 3, this optimization schedule improved the reprojection error for all the failed datasets, yielding in most cases comparable accuracies to those obtained with Colmap.

| Scan                                  | #Images | #Points | Time (seconds) |             |         |        | Scan                           | #Images | #Points | Time (seconds) |             |         |         |  |
|---------------------------------------|---------|---------|----------------|-------------|---------|--------|--------------------------------|---------|---------|----------------|-------------|---------|---------|--|
|                                       |         |         | Inference      | Fine tuning | BA      | Colmap |                                |         |         | Inference      | Fine tuning | BA      | GPSFM   |  |
| Alcatraz Courtyard                    | 133     | 23674   | 0.007          | 199.125     | 43.512  | 286.0  | Alcatraz Water Tower           | 172     | 14828   | 0.055          | 89.646      | 68.939  | 137.057 |  |
| Alcatraz Water Tower                  | 172     | 14828   | 0.007          | 110.847     | 26.44   | 130.0  | Dino 319                       | 36      | 319     | 0.004          | 8.151       | 0.475   | 3.253   |  |
| Drinking Fountain Somewhere In Zurich | 14      | 5302    | 0.007          | 20.302      | 2.925   | 16.0   | Dino 4983                      | 36      | 4983    | 0.122          | 7.66        | 2.21    | 4.994   |  |
| Nijo Castle Gate                      | 19      | 7348    | 0.008          | 24.493      | 4.308   | 21.0   | Dome                           | 85      | 84792   | 0.203          | 160.896     | 76.867  | 105.837 |  |
| Porta San Donato Bologna              | 141     | 25490   | 0.007          | 194.651     | 45.416  | 170.0  | Drinking Fountain              | 14      | 5302    | 0.01           | 18.197      | 3.016   | 3.348   |  |
| Round Church Cambridge                | 92      | 84643   | 0.014          | 360.97      | 90.092  | 229.0  | Gustav Vasa                    | 18      | 4249    | 0.007          | 14.435      | 2.766   | 3.449   |  |
| Smolny Cathedral St Petersburg        | 131     | 51115   | 0.004          | 534.528     | 101.456 | 516.0  | Nijo                           | 19      | 7348    | 0.013          | 34.397      | 3.121   | 6.37    |  |
| Some Cathedral In Barcelona           | 177     | 30367   | 0.007          | 208.542     | 55.424  | 451.0  | Skansen Kronan                 | 131     | 28371   | 0.141          | 197.531     | 63.853  | 93.831  |  |
| Sri Veeramakaliamman Singapore        | 157     | 130013  | 0.319          | 291.727     | 242.888 | 583.0  | Some Cathedral In Barcelona    | 177     | 30367   | 0.133          | 185.984     | 47.597  | 110.485 |  |
| Yueh Hai Ching Temple Singapore       | 43      | 13774   | 0.004          | 45.458      | 10.539  | 106.0  | Sri Veeramakaliamman Singapore | 157     | 130013  | 0.314          | 473.294     | 195.374 | 301.713 |  |

Table 4: Execution times for our trained model. The table shows execution times in seconds in the calibrated (left) and uncalibrated (right) settings.

**Learning from multiple scenes.** Figures 6 and 7 show reconstruction results using our model before and after bundle adjustment in 3 scenarios: (i) inference using our trained model (ii) inference followed by fine tuning and (iii) short run of optimization. Table 4 shows execution times for our trained model. We note that using inference only yields a good initialization for bundle adjustment in a small fraction of a second. Using fine tuning yields more accurate results (See Table 2 in the paper) with execution times similar to Colmap. The short optimization generally yields less accurate results with execution times similar to fine tuning, emphasizing the importance of the trained model.



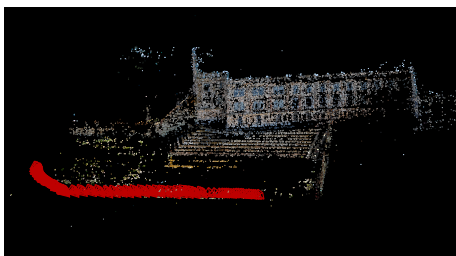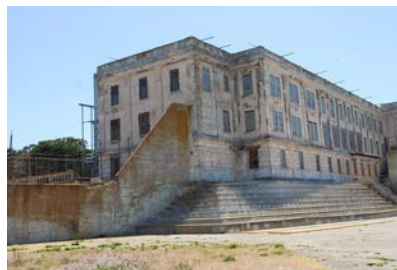

(a) Alcatraz Courtyard

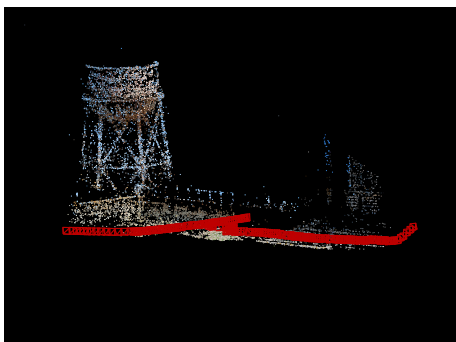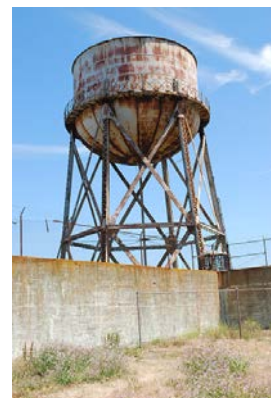

(b) Alcatraz Water Tower

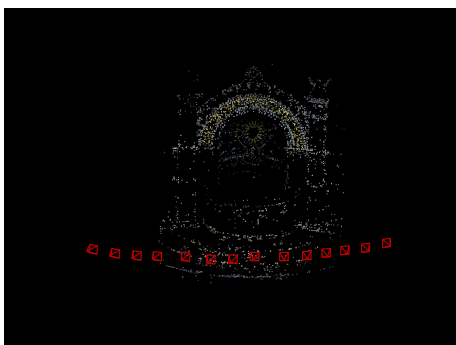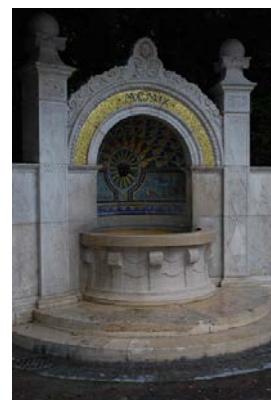

(c) Drinking Fountain Somewhere In Zurich

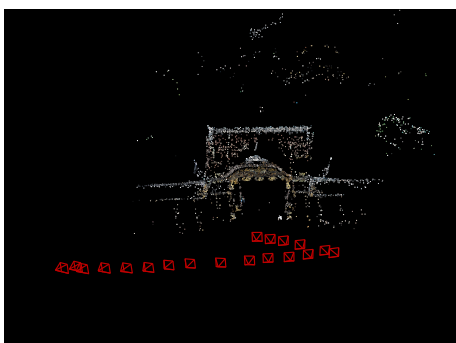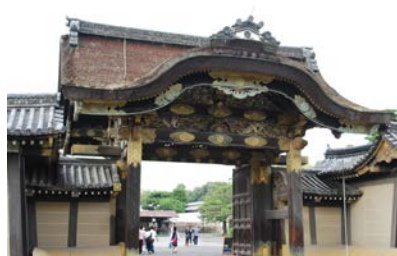

(d) Nijo Castle Gate

Figure 1: Single scene 3D reconstructions and recovery of camera parameters with our method. Each pair shows on the left the triangulated point cloud and the recovered camera locations and orientations (in red) and on the right one of the input images.

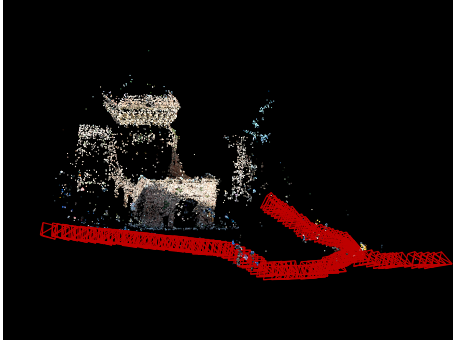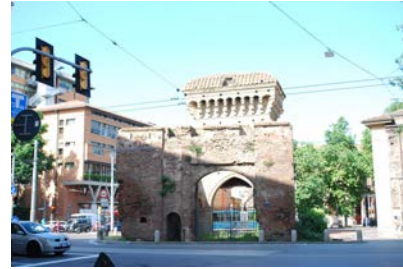

(a) Porta San Donato Bologna

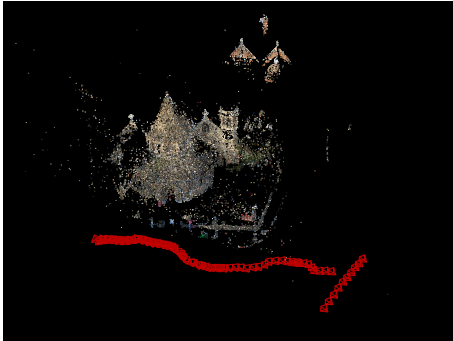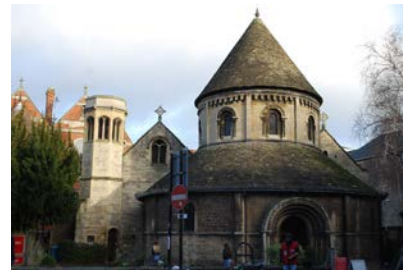

(b) Round Church Cambridge

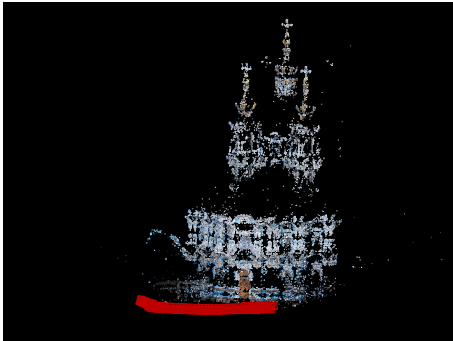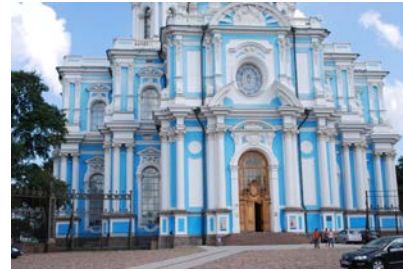

(c) Smolny Cathedral St Petersburg

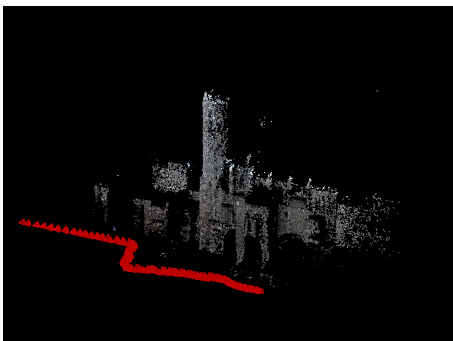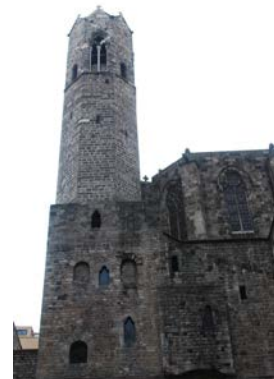

(d) Some Cathedral In Barcelona

Figure 2: Single scene 3D reconstructions and recovery of camera parameters with our method. Each pair shows on the left the triangulated point cloud and the recovered camera locations and orientations (in red) and on the right one of the input images.

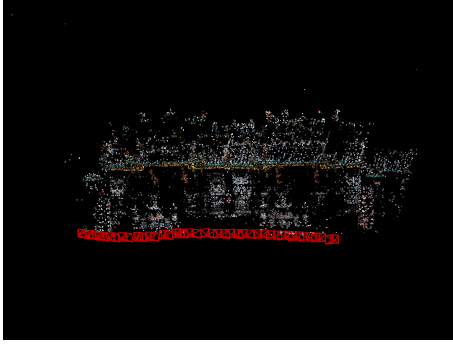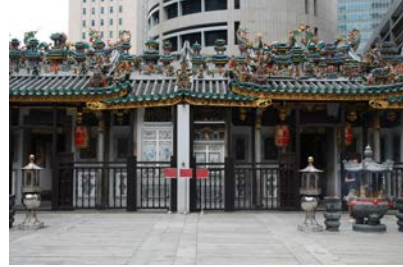

(a) Yueh Hai Ching Temple Singapore

Figure 3: Single scene 3D reconstructions and recovery of camera parameters with our method. Each pair shows on the left the triangulated point cloud and the recovered camera locations and orientations (in red) and on the right one of the input images.

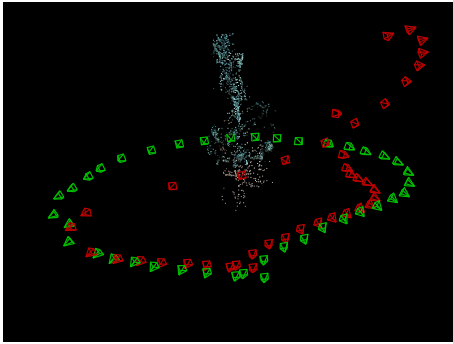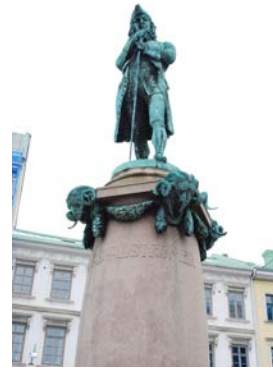

Figure 4: A failure case. Single scene 3D reconstruction and recovery of camera parameters with our method applied to Jonas Ahlstromer (reprojection error 8.41 pixels). The left image shows the triangulated point cloud, the recovered camera locations and orientations (in red) and the ground truth camera locations and orientations (in green). The right image is one of the input images.

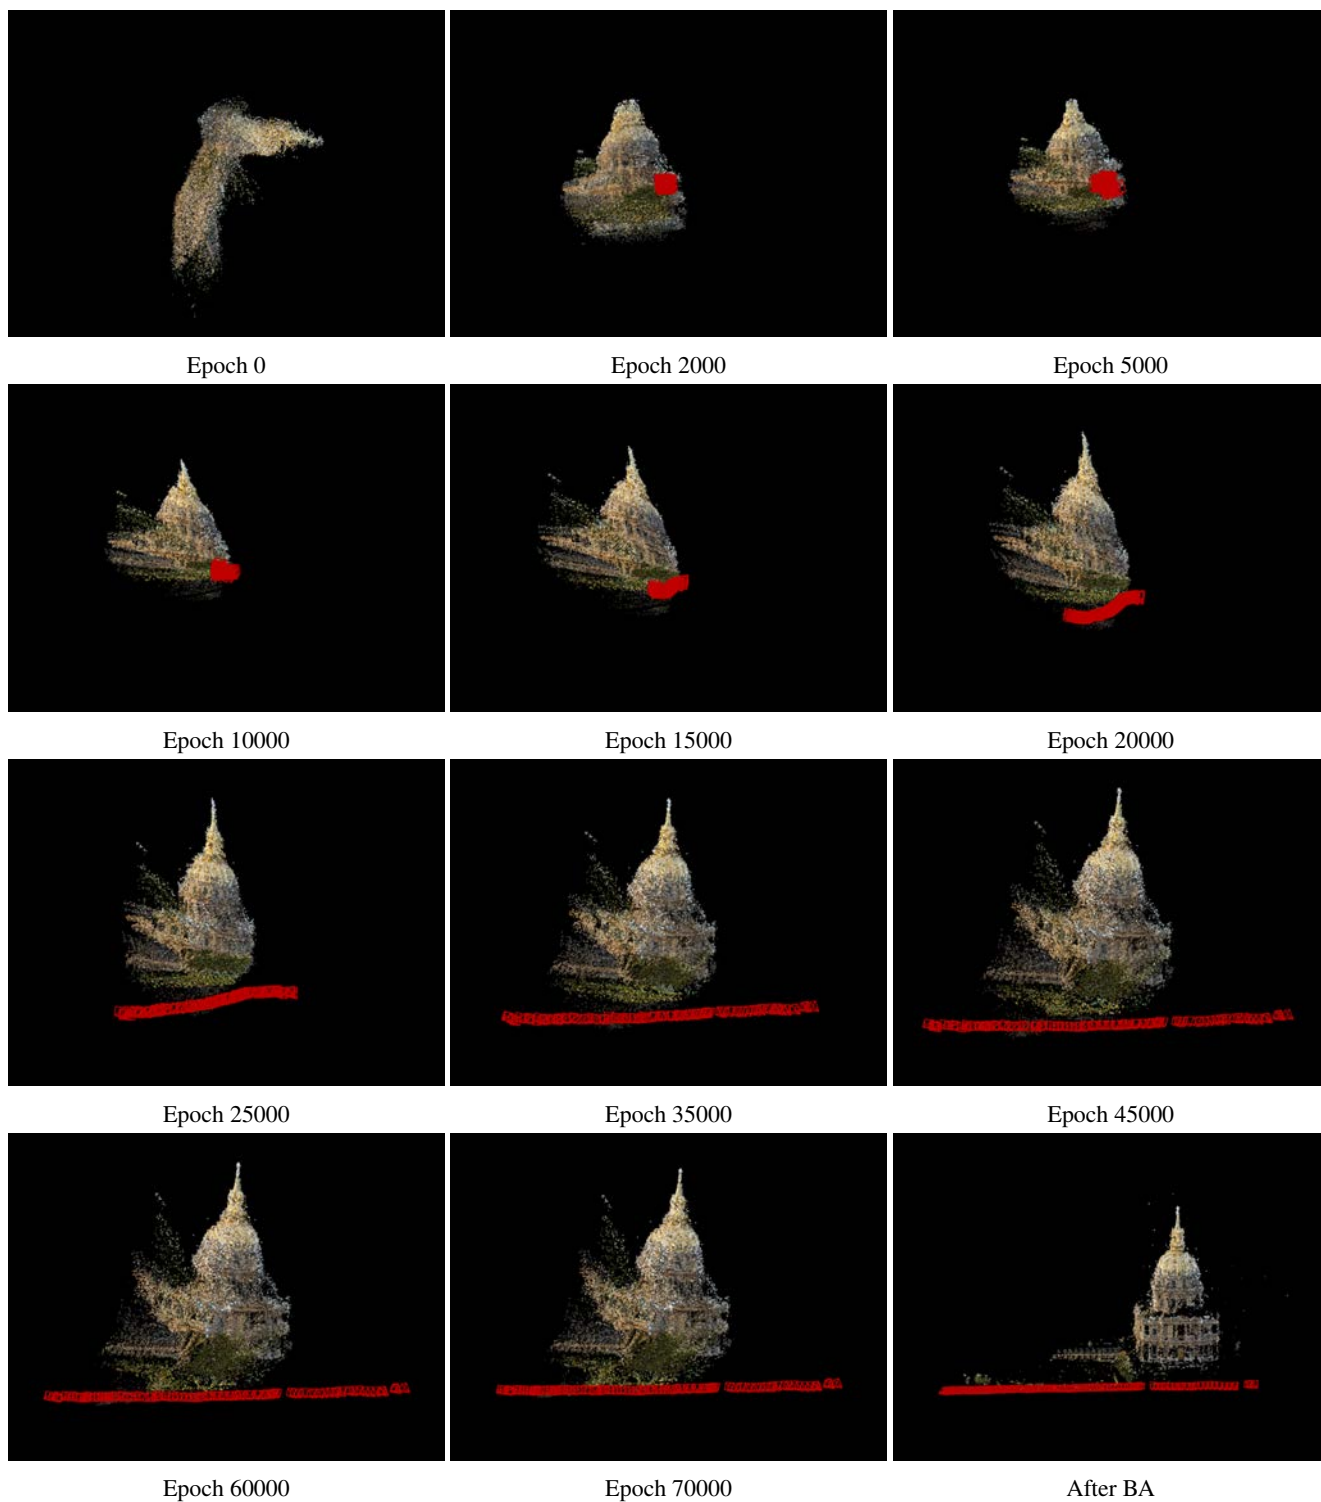

Figure 5: 3D structure and camera parameter evolution during the optimization of the network.

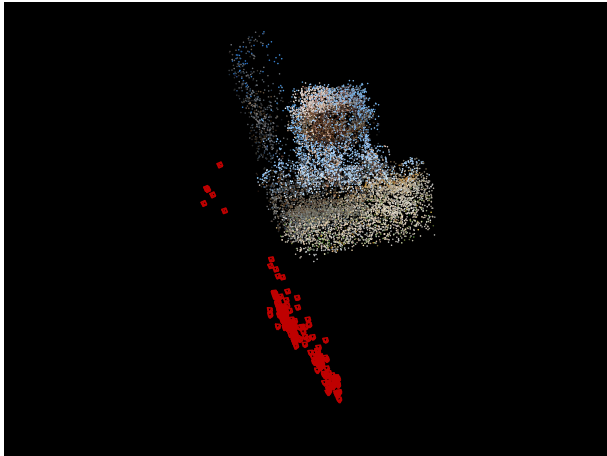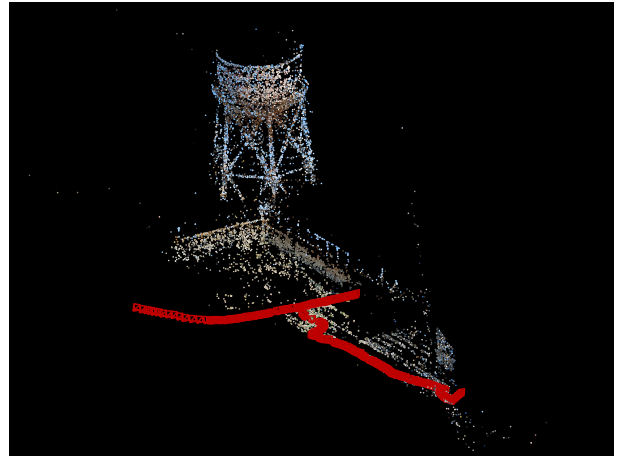

(a) Inference before (left) and after (right) BA

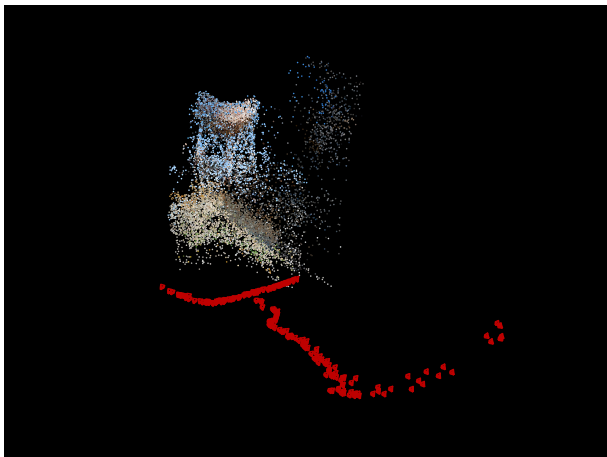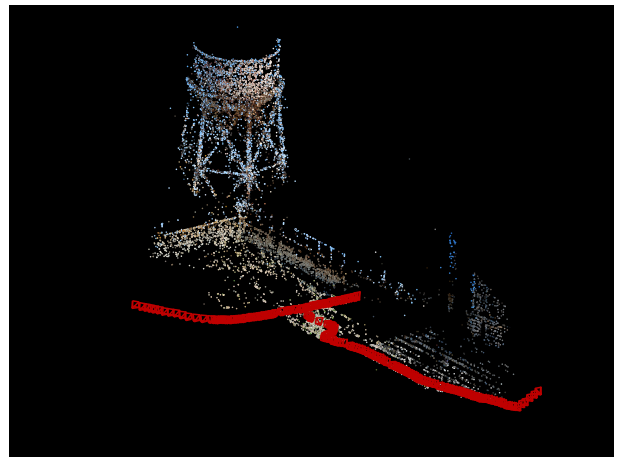

(b) Inference + fine tuning before (left) and after (right) BA

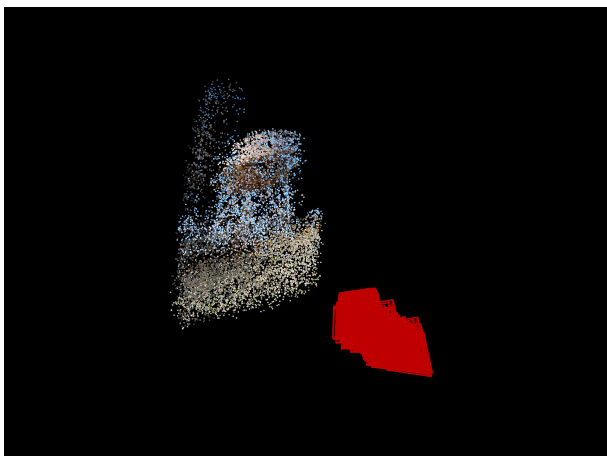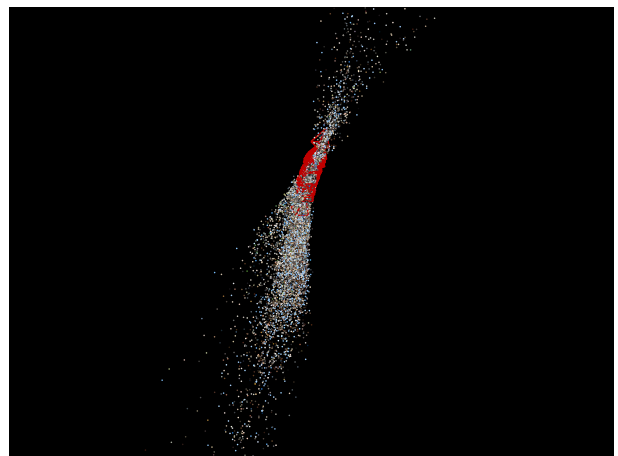

(c) Short optimization before (left) and after (right) BA

Figure 6: Alcatraz Water Tower. Reconstruction with our trained model. The figure shows results of inference (top row) and inference followed by fine tuning (middle row) before BA (left) and after BA (right). The bottom row shows the result of the short optimization strategy (starting with a random initialization). Each panel shows the recovered cameras positions (in red) and the recovered 3D points, corresponding to the point tracks. It can be seen that in this case accurate reconstruction can be obtained either by pure inference or inference followed by fine tuning (+ BA). In contrast, short optimization failed to accurately recover camera positions, leading to failure of the BA.



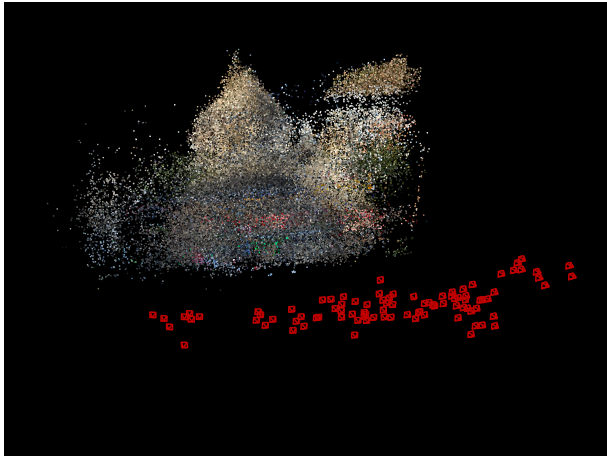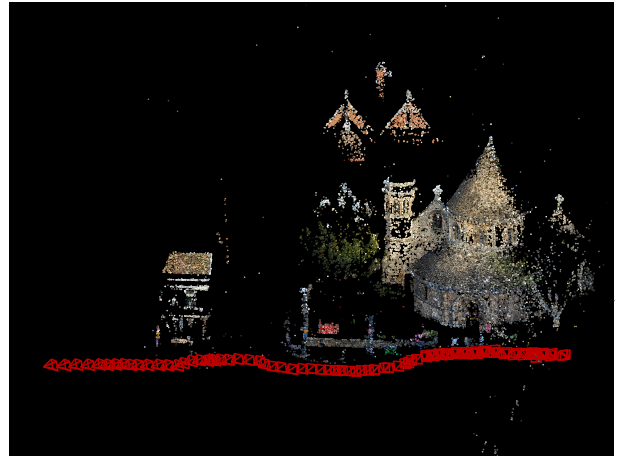

(a) Inference before (left) and after (right) BA

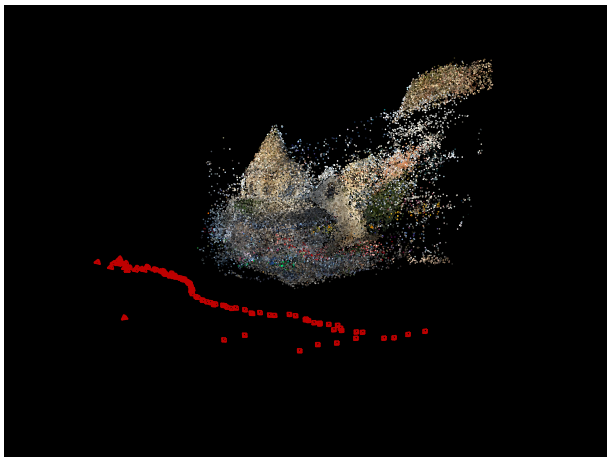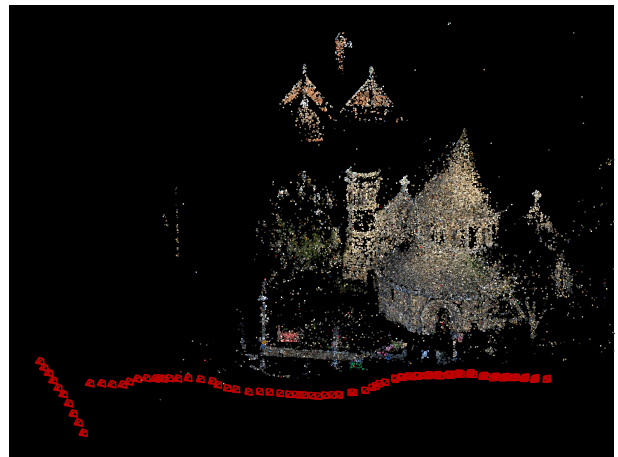

(b) Inference + fine tuning before (left) and after (right) BA

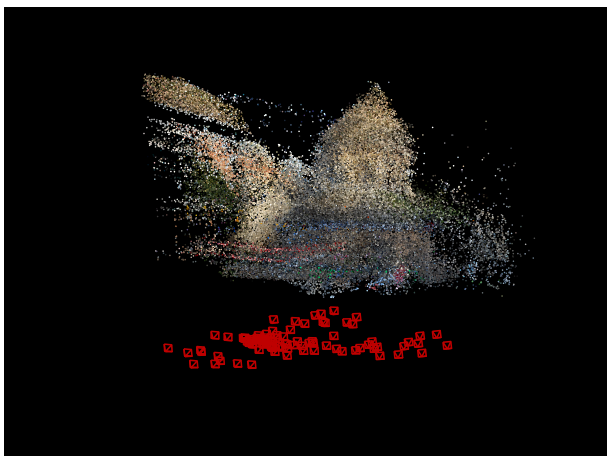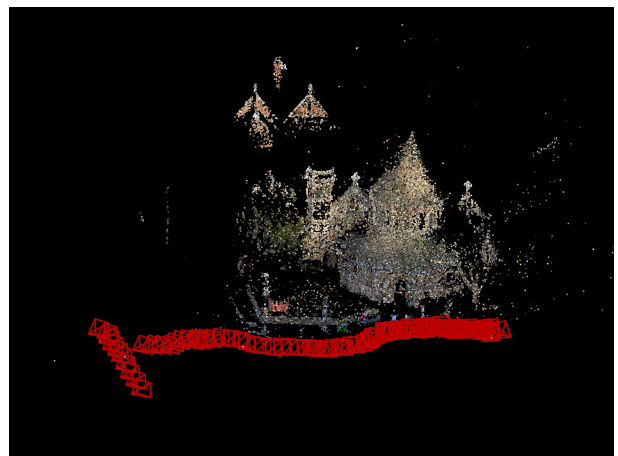

(c) Short optimization before (left) and after (right) BA

Figure 7: Round Church Cambridge. Reconstruction with our trained model. The figure shows results of inference (top row) and fine tuning (middle row) before BA (left) and after BA (right). The bottom row shows the result of the short optimization (starting with a random initialization). Each panel shows the recovered cameras positions (in red) and 3D points. Here fine tuning + BA yielded the most accurate reconstruction.

## References

- [1] Justin Gilmer, Samuel S Schoenholz, Patrick F Riley, Oriol Vinyals, and George E Dahl. Neural message passing for quantum chemistry. In *International Conference on Machine Learning*, pages 1263–1272. PMLR, 2017. 2
- [2] Je Hyeong Hong, Christopher Zach, Andrew Fitzgibbon, and Roberto Cipolla. Projective bundle adjustment from arbitrary initialization using the variable projection method. In *European Conference on Computer Vision*, pages 477–493. Springer, 2016. 2
- [3] Nianjuan Jiang, Zhaopeng Cui, and Ping Tan. A global linear method for camera pose registration. In *Proceedings of the IEEE International Conference on Computer Vision*, pages 481–488, 2013. 1, 3
- [4] Yoni Kasten, Amnon Geifman, Meirav Galun, and Ronen Basri. Algebraic characterization of essential matrices and their averaging in multiview settings. In *Proceedings of the IEEE International Conference on Computer Vision*, pages 5895–5903, 2019. 3
- [5] Yoni Kasten, Amnon Geifman, Meirav Galun, and Ronen Basri. Gpsfm: Global projective sfm using algebraic constraints on multi-view fundamental matrices. In *Proceedings of the IEEE Conference on Computer Vision and Pattern Recognition*, pages 3264–3272, 2019. 2
- [6] Ludovic Magerand and Alessio Del Bue. Practical projective structure from motion (p2sfm). In *Proceedings of the IEEE International Conference on Computer Vision*, pages 39–47, 2017. 2
- [7] Carl Olsson and Olof Enqvist. Stable structure from motion for unordered image collections. In *Scandinavian Conf. on Image Analysis*, pages 524–535. Springer, 2011. 1
- [8] Charles R Qi, Hao Su, Kaichun Mo, and Leonidas J Guibas. Pointnet: Deep learning on point sets for 3d classification and segmentation. In *Proceedings of the IEEE conference on computer vision and pattern recognition*, pages 652–660, 2017. 1
- [9] Johannes Lutz Schönberger and Jan-Michael Frahm. Structure-from-motion revisited. In *Conference on Computer Vision and Pattern Recognition (CVPR)*, 2016. 1
- [10] Johannes L. Schönberger. Colmap code. <https://colmap.github.io/>. 3
- [11] Manzil Zaheer, Satwik Kottur, Siamak Ravanbakhsh, Barnabas Poczos, Ruslan R Salakhutdinov, and Alexander J Smola. Deep sets. In *Advances in neural information processing systems*, pages 3391–3401, 2017. 1
